# Supplementary material
Source: HighWire-hosted journal article supplement (http://www.qdcxjkg.com/highwire/filestream/114057/field_highwire_adjunct_files/0/ERJ-01824-2012_Disclosures.pdf)
Supplement: ERJ-01824-2012_Disclosures.pdf [file ERJ-01824-2012_Disclosures.pdf]

**B. Hayes** was employed by GlaxoSmithKline and was reimbursed by GlaxoSmithKline for attending symposia. B. Hayes also holds shares in GlaxoSmithKline.

**P.F. Mercer** has received collaborative research funding as well as unrestricted grant funding from GlaxoSmithKline in addition to honoraria for pharmaceutical company consortia.

**A. Blanchard** is employed by and holds shares in GlaxoSmithKline.

**R.C. Chambers** is the recipient of research funding as part of an on-going industry–academic collaboration with GlaxoSmithKline. R.C. Chambers has also acted as a consultant for GlaxoSmithKline.
